# Supplementary material for: Investigation of Hot Spot Region in XIAP Inhibitor Binding Site by Fragment Molecular Orbital Method
Source: PubMed Central journal article supplement — Comput Struct Biotechnol J. 2019 Aug 21;17:1217–25. doi: 10.1016/j.csbj.2019.08.004 (PMC6816037; doi:10.1016/j.csbj.2019.08.004), 2019-08-21
Supplement: mmc1.pdf [file mmc1.pdf]

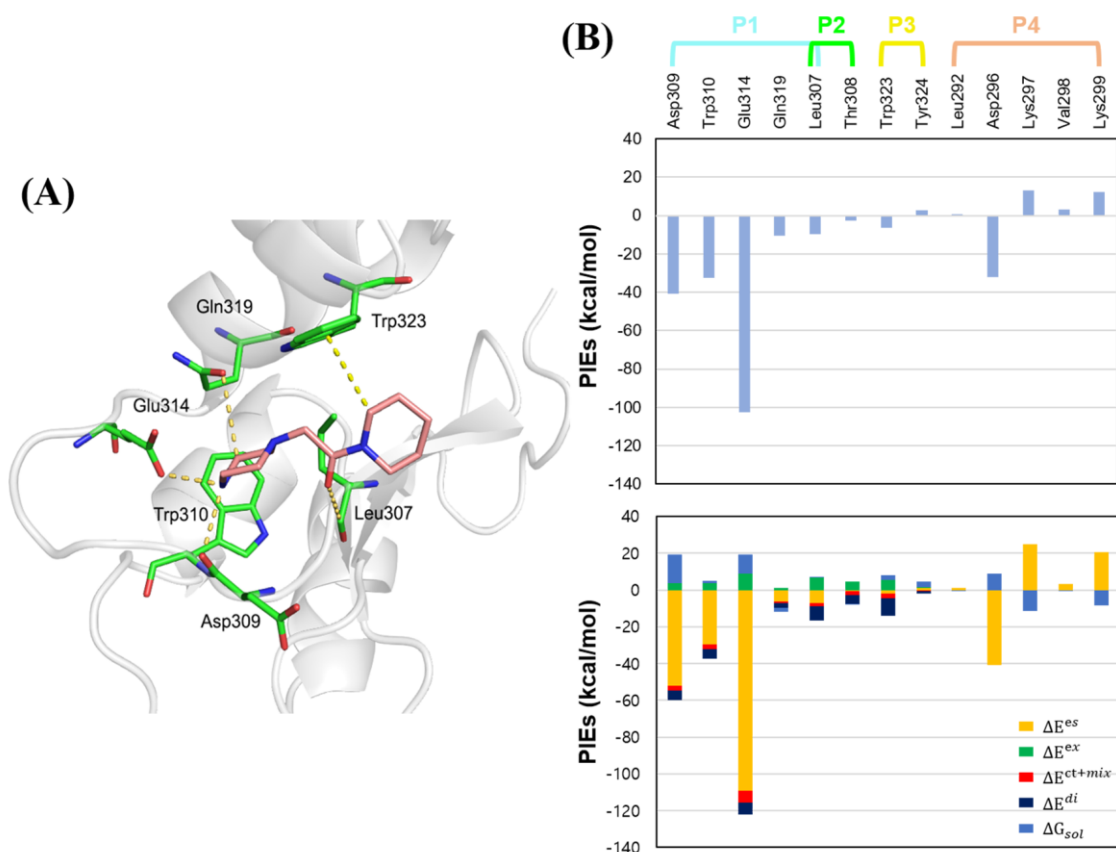

**Figure S1. The FMO result for 1 in complex with XIAP-BIR3.** (A) The structure of **1** binding to the subpockets of XIAP-BIR3. The ligand is shown in light pink and the residues of protein are colored green. Nitrogen and oxygen atoms are colored in blue and red, respectively. The key interactions according to FMO calculations are marked as yellow dashed lines. (B) The top-hand bar plot describes the PIEs of the significant residues in the four subpockets of XIAP-BIR3, and the bottom-hand bar plot describes the PIEDA of these key interactions. The electrostatic, exchange repulsion, charge transfer with higher order mixed term, dispersion, and solvation energy terms are colored in yellow, green, red, dark blue, and light blue, respectively.

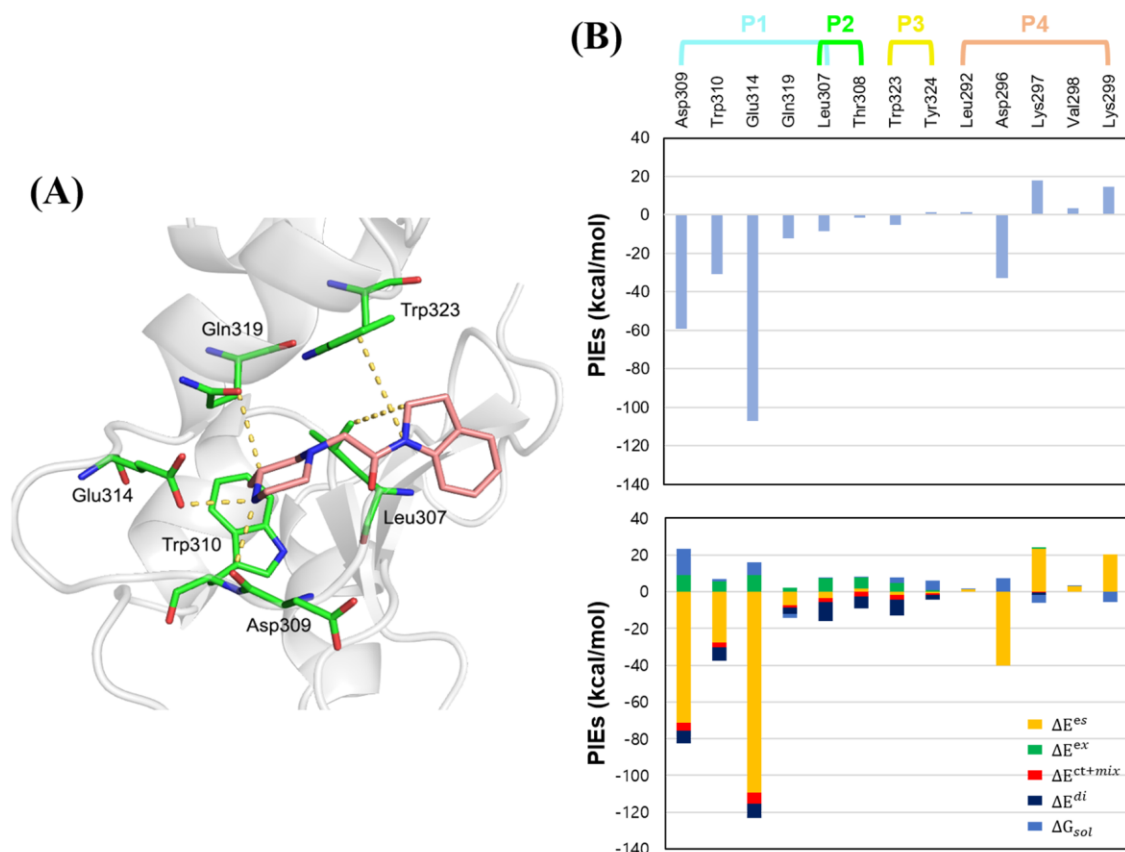

**Figure S2. The FMO result for 2 in complex with XIAP-BIR3.** (A) The structure of 2 binding to the subpockets of XIAP-BIR3. The ligand is shown in light pink and the residues of protein are colored green. Nitrogen and oxygen atoms are colored in blue and red, respectively. The key interactions according to FMO calculations are marked as yellow dashed lines. (B) The top-hand bar plot describes the PIEs of the significant residues in the four subpockets of XIAP-BIR3, and the bottom-hand bar plot describes the PIEDA of these key interactions. The electrostatic, exchange repulsion, charge transfer with higher order mixed term, dispersion, and solvation energy terms are colored in yellow, green, red, dark blue, and light blue, respectively.

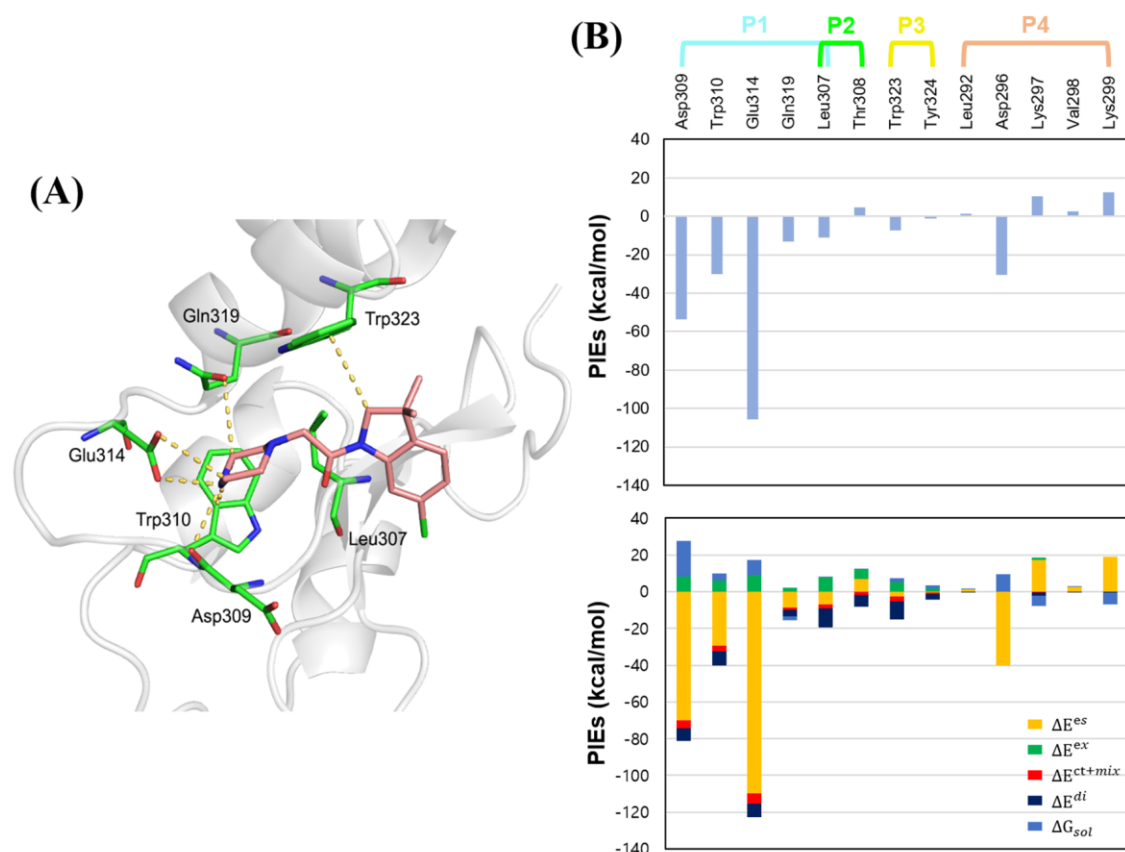

**Figure S3. The FMO result for 3 in complex with XIAP-BIR3.** (A) The structure of 3 binding to the subpockets of XIAP-BIR3. The ligand is shown in light pink and the residues of protein are colored green. Nitrogen, oxygen, and chlorine atoms are colored in blue, red, and green respectively. The key interactions according to FMO calculations are marked as yellow dashed lines. (B) The top-hand bar plot describes the PIEs of the significant residues in the four subpockets of XIAP-BIR3, and the bottom-hand bar plot describes the PIEDA of these key interactions. The electrostatic, exchange repulsion, charge transfer with higher order mixed term, dispersion, and solvation energy terms are colored in yellow, green, red, dark blue, and light blue, respectively.

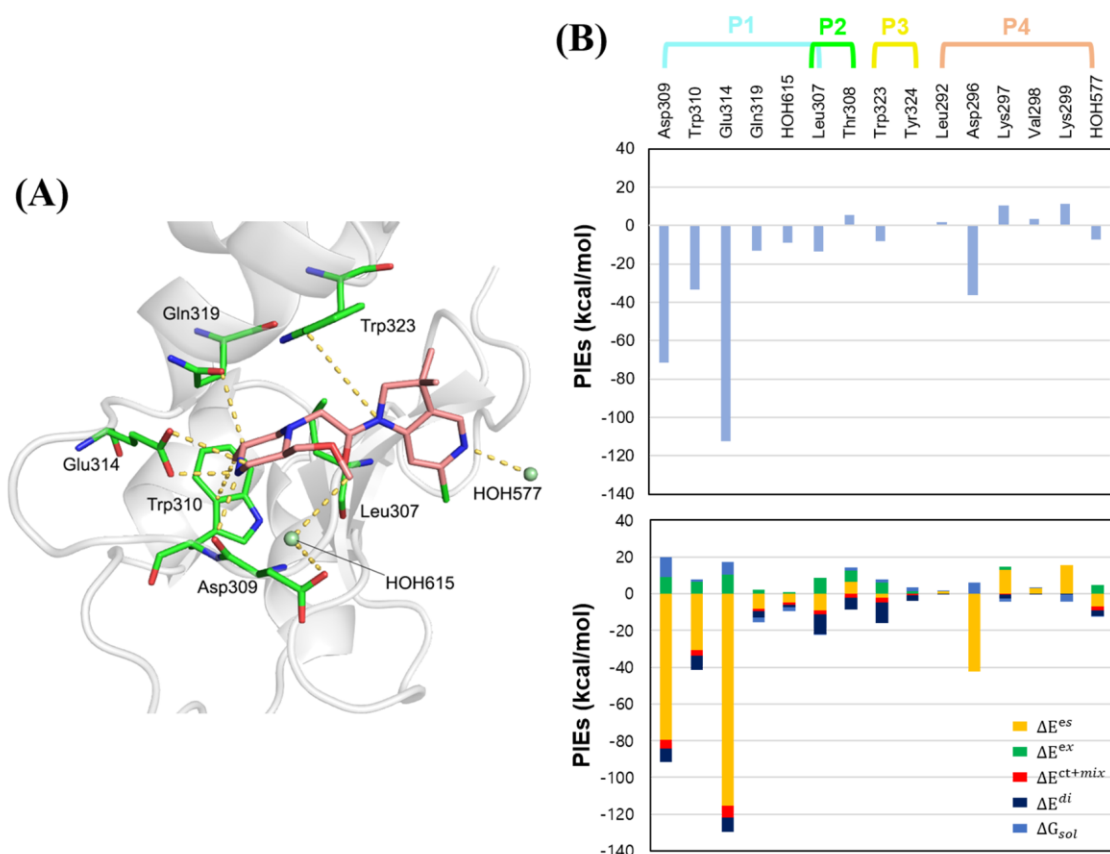

**Figure S4. The FMO result for 4 in complex with XIAP-BIR3.** (A) The structure of 4 binding to the subpockets of XIAP-BIR3. The ligand is shown in light pink, the residues of protein and water molecules are colored green and light green, respectively. Nitrogen, oxygen, and chlorine atoms are colored in blue, red, and green respectively. The key interactions according to FMO calculations are marked as yellow dashed lines. (B) The top-hand bar plot describes the PIEs of the significant residues in the four subpockets of XIAP-BIR3, and the bottom-hand bar plot describes the PIEDA of these key interactions. The electrostatic, exchange repulsion, charge transfer with higher order mixed term, dispersion, and solvation energy terms are colored in yellow, green, red, dark blue, and light blue, respectively. HOH615 is positioned in the P1 pocket and acts as a bridge between 4 and the Asp309 of XIAP-BIR3, whereas HOH577 is located to the P4 pocket and improves the binding affinity between 4 and XIAP-BIR3.

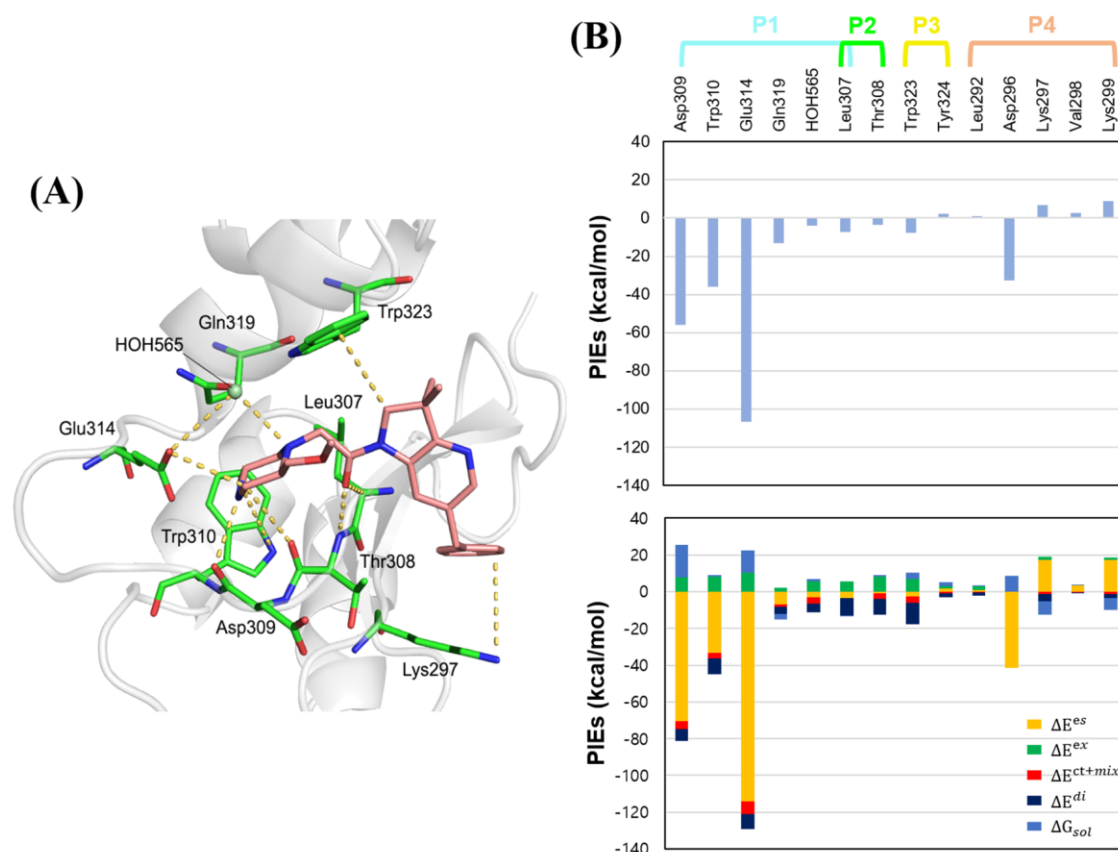

**Figure S5. The FMO result for 5 in complex with XIAP-BIR3.** (A) The structure of 5 binding to the subpockets of XIAP-BIR3. The ligand is shown in light pink, the residues of protein and water molecule are colored green and light green, respectively. Nitrogen and oxygen atoms are colored in blue and red, respectively. The key interactions according to FMO calculations are marked as yellow dashed lines. (B) The top-hand bar plot describes the PIEs of the significant residues in the four subpockets of XIAP-BIR3, and the bottom-hand bar plot describes the PIEDA of these key interactions. The electrostatic, exchange repulsion, charge transfer with higher order mixed term, dispersion, and solvation energy terms are colored in yellow, green, red, dark blue, and light blue, respectively. HOH565 is positioned in the P1 pocket and acts as a bridge between 5 and the residues (Glu314 and Gln319) of XIAP-BIR3.

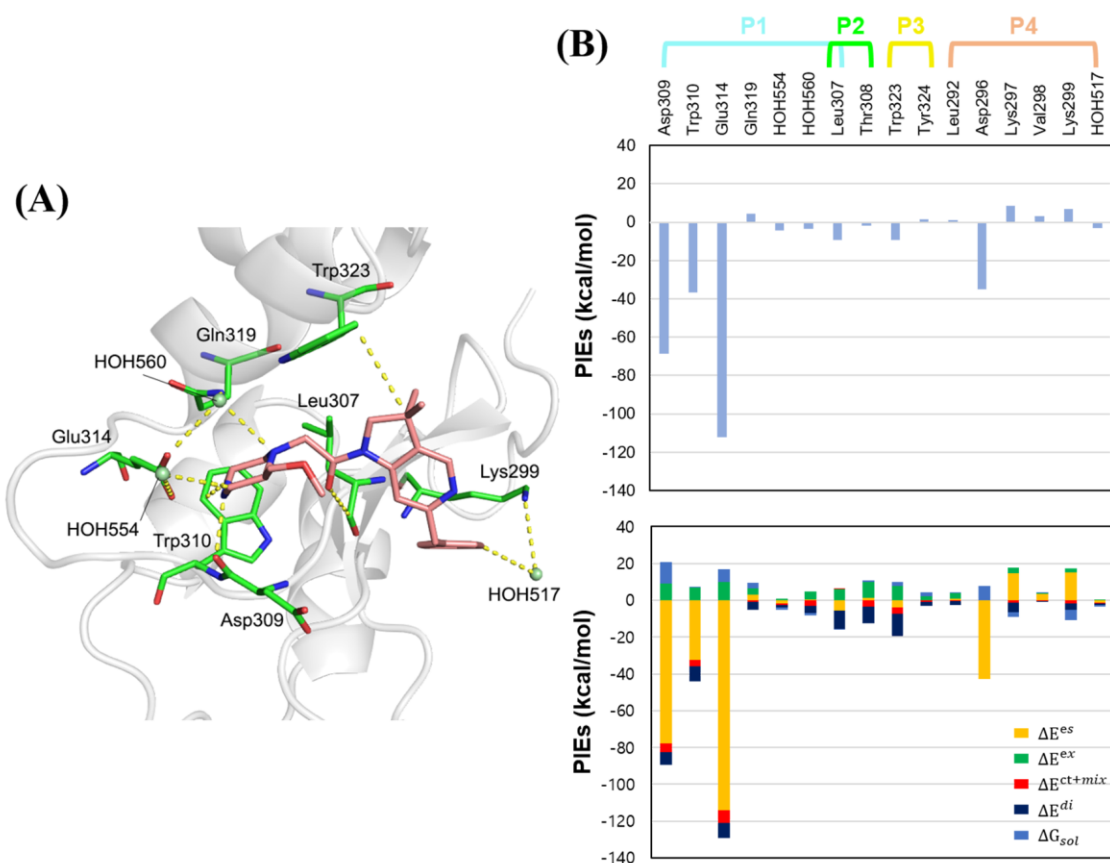

**Figure S6. The FMO result for 6 in complex with XIAP-BIR3.** (A) The structure of **6** binding to the subpockets of XIAP-BIR3. The ligand is shown in light pink, the residues of protein and water molecule are colored green and light green, respectively. Nitrogen and oxygen atoms are colored in blue and red, respectively. The key interactions according to FMO calculations are marked as yellow dashed lines. (B) The top-hand bar plot describes the PIEs of the significant residues in the four subpockets of XIAP-BIR3, and the bottom-hand bar plot describes the PIEEDA of these key interactions. The electrostatic, exchange repulsion, charge transfer with higher order mixed term, dispersion, and solvation energy terms are colored in yellow, green, red, dark blue, and light blue, respectively. HOH517 is positioned in the P4 pocket and acts as a bridge between **6** and the Lys299 of XIAP-BIR3, whereas two water molecules (HOH554 and HOH560) are located to the P1 pocket and improve the binding affinity between **6** and XIAP-BIR3.

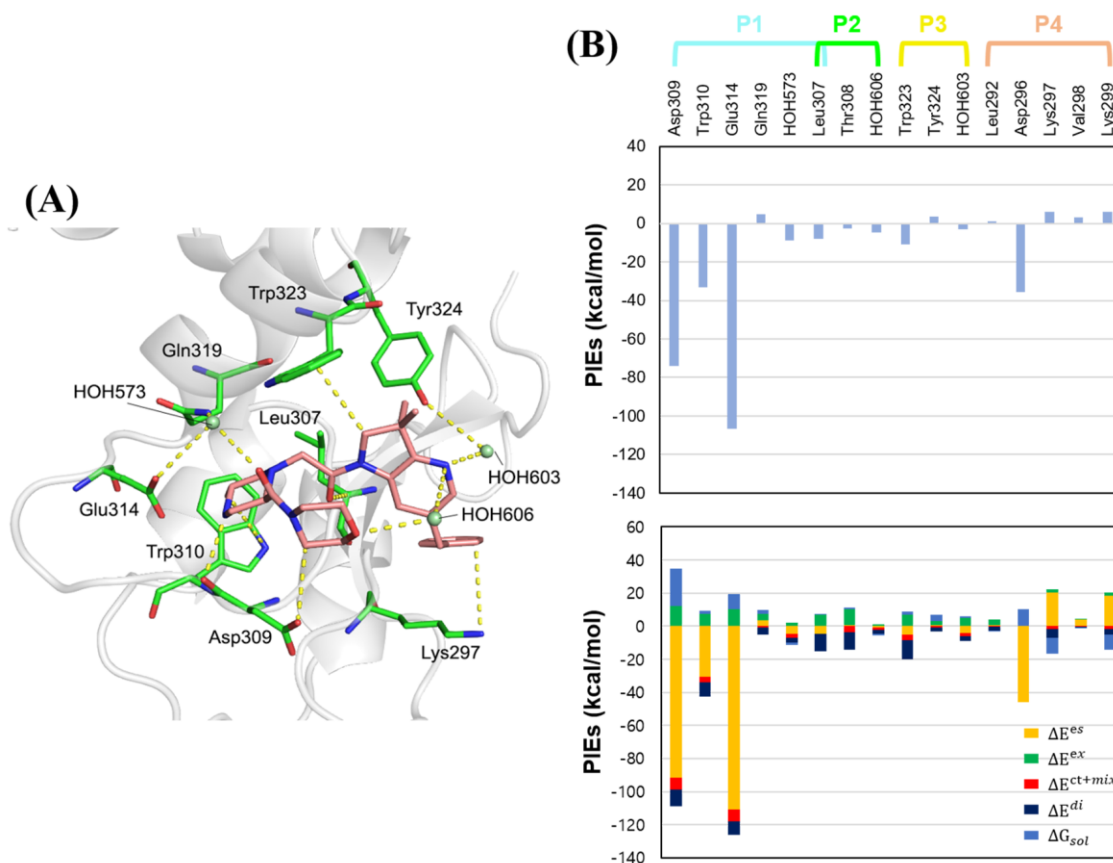

**Figure S7. The FMO result for 7 in complex with XIAP-BIR3.** (A) The structure of 7 binding to the subpockets of XIAP-BIR3. The ligand is shown in light pink, the residues of protein and water molecule are colored green and light green, respectively. Nitrogen and oxygen atoms are colored in blue and red, respectively. The key interactions according to FMO calculations are marked as yellow dashed lines. (B) The top-hand bar plot describes the PIEs of the significant residues in the four subpockets of XIAP-BIR3, and the bottom-hand bar plot describes the PIEDA of these key interactions. The electrostatic, exchange repulsion, charge transfer with higher order mixed term, dispersion, and solvation energy terms are colored in yellow, green, red, dark blue, and light blue, respectively. HOH606 and HOH603 are positioned in the P2 and P3 pockets, respectively. HOH573 is located to the P1 pocket and acts as a bridge between 7 and XIAP-BIR3.

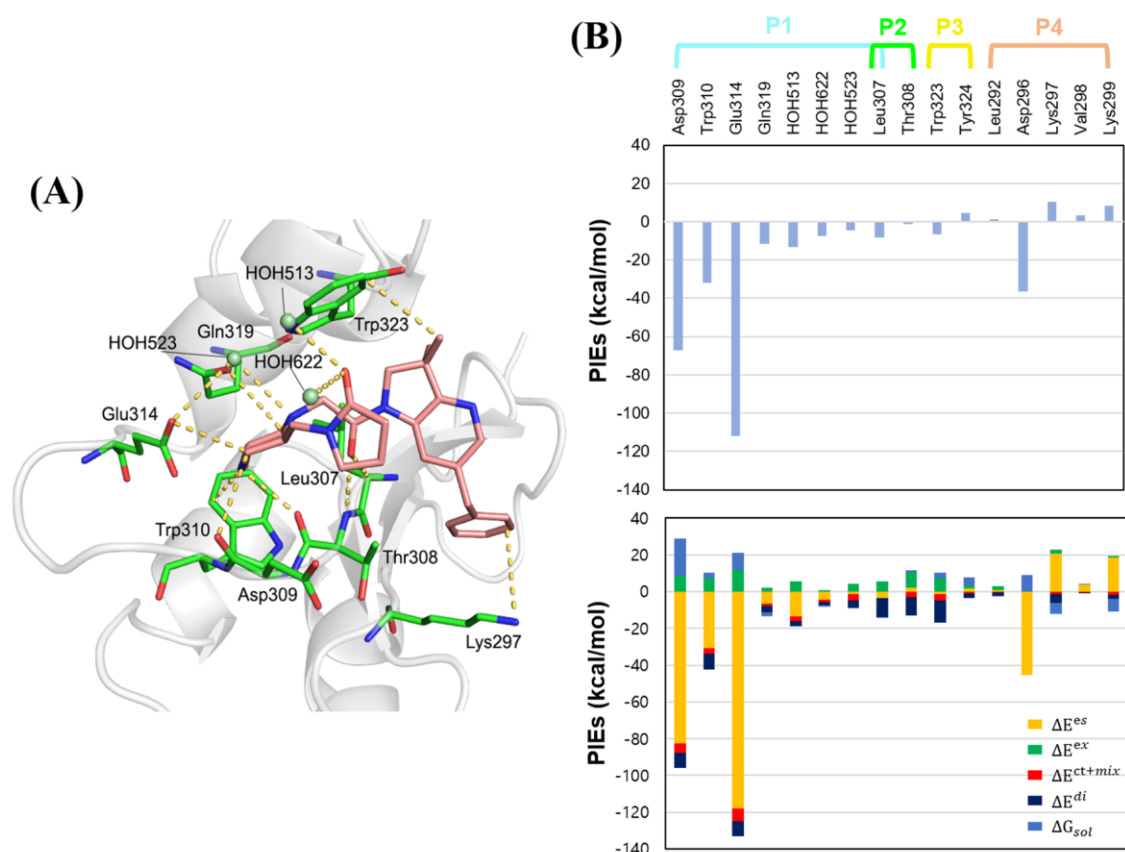

**Figure S8. The FMO result for lead 8 in complex with XIAP-BIR3.** A. The structure of **8** binding to the subpockets of XIAP-BIR3. The ligand is shown in light pink and the residues of the protein are colored green. Nitrogen and oxygen atoms are colored in blue and red, respectively. The key interactions according to the FMO results are marked as yellow dashed lines. B. The top-hand bar plot describes the PIEs of the significant residues in four subpockets of XIAP-BIR3, and the bottom-hand bar plot describes the PIEDA of these key interactions. The electrostatic, exchange repulsion, charge transfer with higher order mixed term, dispersion, and solvation energy terms are colored in yellow, green, red, dark blue, and light blue, respectively. HOH513, HOH523 and HOH622 are positioned in the P1 pocket. HOH557 is located in the P4 pocket and acts as a bridge between **8** and XIAP-BIR3.



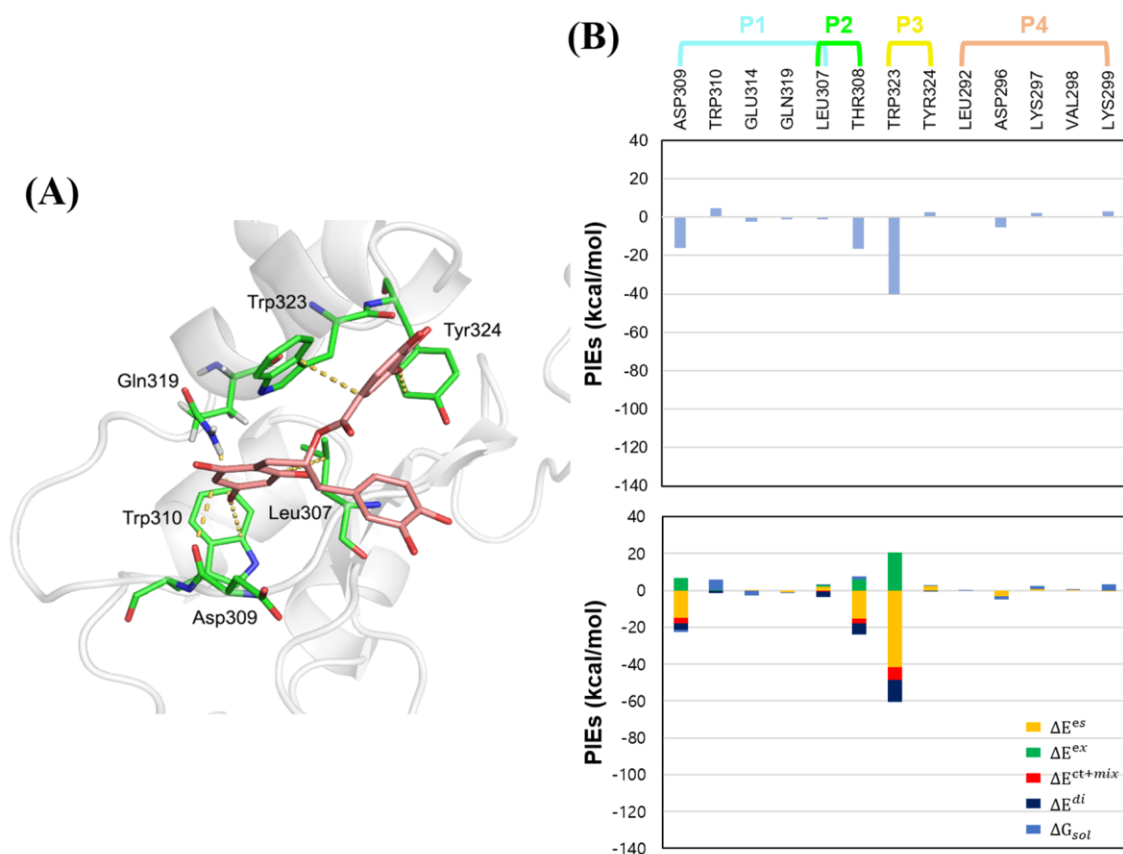

**Figure S9. The FMO result for 9 in complex with XIAP-BIR3.** (A) The structure of 9 binding to the subpockets of XIAP-BIR3. The ligand is shown in light pink and the residues of protein are colored green. Nitrogen atoms and oxygen atoms are colored in blue and red, respectively. The key interactions according to FMO calculations are marked as yellow dashed lines. (B) The top-hand bar plot describes the PIEs of the significant residues in the four subpockets of XIAP-BIR3, and the bottom-hand bar plot describes the PIEDA of these key interactions. The electrostatic, exchange repulsion, charge transfer with higher order mixed term, dispersion, and solvation energy terms are colored in yellow, green, red, dark blue, and light blue, respectively.



**Table S1.** The calculated PIEDA (kcal/mol) between AVPI and XIAP-BIR3 in the four subpockets.

| <b>Pocket</b> | <b>Residue</b> | <b>PIEs</b> | $\Delta E^{es}$ | $\Delta E^{ex}$ | $\Delta E^{ct}$ | $\Delta E^{di}$ | <b>PDB</b> | <b>Total<br/>PIEs</b> |
|---------------|----------------|-------------|-----------------|-----------------|-----------------|-----------------|------------|-----------------------|
| <b>P1</b>     | Asp309         | -51.473     | -65.596         | 9.236           | -4.148          | -6.567          | 1G73       | <b>-208.596</b>       |
|               | Trp310         | -26.779     | -25.224         | 3.866           | -2.206          | -5.607          | 1G73       |                       |
|               | Glu314         | -108.555    | -121.148        | 9.918           | -7.325          | -5.571          | 1G73       |                       |
|               | Gln319         | -21.789     | -18.991         | 4.683           | -3.215          | -4.364          | 1G73       |                       |
| <b>P2</b>     | Leu307         | -19.821     | -15.583         | 10.739          | -2.372          | -11.989         | 1G73       | <b>-26.675</b>        |
|               | Thr308         | -6.854      | -6.143          | 10.252          | -4.194          | -8.013          | 1G73       |                       |
| <b>P3</b>     | Trp323         | -8.716      | -2.991          | 9.239           | -3.536          | -11.875         | 1G73       | <b>-6.37</b>          |
|               | Tyr324         | 2.346       | 2.065           | 0.843           | -0.959          | -2.428          | 1G73       |                       |
| <b>P4</b>     | Leu292         | 1.312       | 1.024           | 2.122           | -0.215          | -1.591          | 1G73       | <b>-4.437</b>         |
|               | Asp296         | -32.425     | -40.841         | 0               | 0               | 0               | 1G73       |                       |
|               | Lys297         | 13.066      | 24.246          | 1.89            | -0.381          | -2.98           | 1G73       |                       |
|               | Val298         | 3.393       | 3.773           | 0.053           | -0.131          | -0.465          | 1G73       |                       |
|               | Lys299         | 10.217      | 19.302          | 0.528           | -0.863          | -1.193          | 1G73       |                       |

**Table S2.** The calculated PIEDA (kcal/mol) between fragment **1** and XIAP-BIR3 in the four subpockets.

| <b>Pocket</b> | <b>Residue</b> | <b>PIEs</b> | $\Delta E^{es}$ | $\Delta E^{ex}$ | $\Delta E^{ct}$ | $\Delta E^{di}$ | <b>PDB</b> | <b>Total<br/>PIEs</b> |
|---------------|----------------|-------------|-----------------|-----------------|-----------------|-----------------|------------|-----------------------|
| <b>P1</b>     | Asp309         | -40.629     | -51.976         | 3.796           | -2.836          | -4.9            | 5C3H       | <b>-186.27</b>        |
|               | Trp310         | -32.326     | -29.532         | 3.894           | -2.592          | -5.115          | 5C3H       |                       |
|               | Glu314         | -102.626    | -109.09         | 8.696           | -6.355          | -6.532          | 5C3H       |                       |
|               | Gln319         | -10.689     | -6.224          | 1.135           | -0.951          | -2.502          | 5C3H       |                       |
| <b>P2</b>     | Leu307         | -9.695      | -6.97           | 6.852           | -2.068          | -7.637          | 5C3H       | <b>-12.535</b>        |
|               | Thr308         | -2.84       | -0.579          | 4.66            | -2.148          | -4.622          | 5C3H       |                       |
| <b>P3</b>     | Trp323         | -6.164      | -1.871          | 5.525           | -2.666          | -9.547          | 5C3H       | <b>-3.543</b>         |
|               | Tyr324         | 2.621       | 1.272           | 0.216           | -0.509          | -1.394          | 5C3H       |                       |
| <b>P4</b>     | Leu292         | 0.854       | 1.235           | 0               | 0               | 0               | 5C3H       | <b>-2.444</b>         |
|               | Asp296         | -31.95      | -40.648         | 0               | 0               | 0               | 5C3H       |                       |
|               | Lys297         | 13.319      | 24.784          | -0.001          | -0.066          | -0.123          | 5C3H       |                       |
|               | Val298         | 3.174       | 3.231           | 0               | 0               | 0               | 5C3H       |                       |
|               | Lys299         | 12.159      | 20.594          | 0               | 0               | 0               | 5C3H       |                       |

**Table S3.** The calculated PIEDA (kcal/mol) between **2** and XIAP-BIR3 in the four subpockets.

| <b>Pocket</b> | <b>Residue</b> | <b>PIEs</b> | $\Delta E^{es}$ | $\Delta E^{ex}$ | $\Delta E^{ct}$ | $\Delta E^{di}$ | <b>PDB</b> | <b>Total<br/>PIEs</b> |
|---------------|----------------|-------------|-----------------|-----------------|-----------------|-----------------|------------|-----------------------|
| <b>P1</b>     | Asp309         | -59.044     | -71.095         | 8.984           | -4.411          | -6.885          | 5C7A       | <b>-209.097</b>       |
|               | Trp310         | -30.798     | -27.69          | 5.48            | -2.745          | -7.307          | 5C7A       |                       |
|               | Glu314         | -107.12     | -109.465        | 9.122           | -6.134          | -7.519          | 5C7A       |                       |
|               | Gln319         | -12.135     | -7.179          | 2.023           | -1.29           | -3.404          | 5C7A       |                       |
| <b>P2</b>     | Leu307         | -8.441      | -3.257          | 7.265           | -2.319          | -10.331         | 5C7A       | <b>-9.708</b>         |
|               | Thr308         | -1.267      | 1.675           | 6.048           | -2.54           | -6.704          | 5C7A       |                       |
| <b>P3</b>     | Trp323         | -5.145      | -1.927          | 4.848           | -2.382          | -8.714          | 5C7A       | <b>-3.658</b>         |
|               | Tyr324         | 1.487       | -0.77           | 1.05            | -0.901          | -2.71           | 5C7A       |                       |
| <b>P4</b>     | Leu292         | 1.272       | 1.246           | 0               | 0               | 0               | 5C7A       | <b>4.614</b>          |
|               | Asp296         | -32.834     | -40.196         | 0               | 0               | 0               | 5C7A       |                       |
|               | Lys297         | 18.093      | 23.466          | 0.784           | -0.449          | -1.358          | 5C7A       |                       |
|               | Val298         | 3.404       | 3.035           | 0               | 0               | 0               | 5C7A       |                       |
|               | Lys299         | 14.679      | 20.398          | 0               | 0               | 0               | 5C7A       |                       |

**Table S4.** The calculated PIEDA (kcal/mol) between **3** and XIAP-BIR3 in the four subpockets.

| <b>Pocket</b> | <b>Residue</b> | <b>PIEs</b> | $\Delta E^{es}$ | $\Delta E^{ex}$ | $\Delta E^{ct}$ | $\Delta E^{di}$ | <b>PDB</b> | <b>Total<br/>PIEs</b> |
|---------------|----------------|-------------|-----------------|-----------------|-----------------|-----------------|------------|-----------------------|
| <b>P1</b>     | Asp309         | -53.564     | -69.829         | 8.307           | -4.636          | -6.679          | 5C7C       | <b>-202.277</b>       |
|               | Trp310         | -30.187     | -29.499         | 6.224           | -3.099          | -7.727          | 5C7C       |                       |
|               | Glu314         | -105.504    | -109.633        | 9.012           | -5.668          | -7.436          | 5C7C       |                       |
|               | Gln319         | -13.022     | -8.648          | 2.305           | -1.266          | -3.538          | 5C7C       |                       |
| <b>P2</b>     | Leu307         | -11.108     | -6.882          | 7.965           | -2.004          | -10.548         | 5C7C       | <b>-6.509</b>         |
|               | Thr308         | 4.599       | 7.039           | 5.17            | -1.575          | -6.514          | 5C7C       |                       |
| <b>P3</b>     | Trp323         | -7.535      | -2.689          | 5.382           | -2.567          | -9.847          | 5C7C       | <b>-8.648</b>         |
|               | Tyr324         | -1.113      | -0.407          | 1.679           | -0.986          | -3.006          | 5C7C       |                       |
| <b>P4</b>     | Leu292         | 1.452       | 1.219           | -0.001          | 0.035           | -0.025          | 5C7C       | <b>-3.446</b>         |
|               | Asp296         | -30.665     | -40.13          | 0               | 0               | 0               | 5C7C       |                       |
|               | Lys297         | 10.545      | 17.143          | 1.379           | -0.218          | -1.908          | 5C7C       |                       |
|               | Val298         | 2.719       | 2.663           | -0.001          | -0.063          | -0.065          | 5C7C       |                       |
|               | Lys299         | 12.503      | 19.185          | -0.001          | -0.175          | -0.112          | 5C7C       |                       |

**Table S5.** The calculated PIEDA (kcal/mol) between **4** and XIAP-BIR3 in the four subpockets.

| <b>Pocket</b> | <b>Residue</b> | <b>PIEs</b> | $\Delta E^{es}$ | $\Delta E^{ex}$ | $\Delta E^{ct}$ | $\Delta E^{di}$ | <b>PDB</b> | <b>Total<br/>PIEs</b> |
|---------------|----------------|-------------|-----------------|-----------------|-----------------|-----------------|------------|-----------------------|
| <b>P1</b>     | Asp309         | -71.585     | -79.345         | 8.979           | -4.898          | -7.224          | 5C84       | <b>-230.717</b>       |
|               | Trp310         | -33.425     | -30.526         | 6.468           | -2.97           | -7.919          | 5C84       |                       |
|               | Glu314         | -112.451    | -115.374        | 10.483          | -6.339          | -7.885          | 5C84       |                       |
|               | Gln319         | -13.256     | -8.378          | 2.252           | -1.208          | -3.49           | 5C84       |                       |
| <b>P2</b>     | Leu307         | -13.691     | -8.989          | 8.717           | -2.416          | -10.809         | 5C84       | <b>-8.176</b>         |
|               | Thr308         | 5.515       | 6.649           | 6.088           | -1.957          | -6.751          | 5C84       |                       |
| <b>P3</b>     | Trp323         | -8.269      | -2.164          | 6.195           | -2.73           | -11.043         | 5C84       | <b>-8.514</b>         |
|               | Tyr324         | -0.245      | 0.125           | 1.401           | -0.969          | -2.941          | 5C84       |                       |
| <b>P4</b>     | Leu292         | 1.565       | 1.346           | -0.001          | 0.009           | -0.014          | 5C84       | <b>-9.657</b>         |
|               | Asp296         | -36.229     | -42.438         | 0               | 0               | 0               | 5C84       |                       |
|               | Lys297         | 10.566      | 13.111          | 1.637           | -0.451          | -1.917          | 5C84       |                       |
|               | Val298         | 3.208       | 2.893           | -0.001          | -0.069          | -0.065          | 5C84       |                       |
|               | Lys299         | 11.233      | 15.37           | -0.001          | -0.104          | -0.106          | 5C84       |                       |

**Table S6.** The calculated PIEDA (kcal/mol) between **5** and XIAP-BIR3 in the four subpockets.

| <b>Pocket</b> | <b>Residue</b> | <b>PIEs</b> | $\Delta E^{es}$ | $\Delta E^{ex}$ | $\Delta E^{ct}$ | $\Delta E^{di}$ | <b>PDB</b> | <b>Total<br/>PIEs</b> |
|---------------|----------------|-------------|-----------------|-----------------|-----------------|-----------------|------------|-----------------------|
| <b>P1</b>     | Asp309         | -55.87      | -70.54          | 7.921           | -4.088          | -6.587          | 5M6F       | <b>-211.717</b>       |
|               | Trp310         | -35.906     | -33.212         | 8.14            | -3.019          | -8.663          | 5M6F       |                       |
|               | Glu314         | -106.815    | -114.078        | 10.258          | -7.026          | -8.196          | 5M6F       |                       |
|               | Gln319         | -13.126     | -7.062          | 2.196           | -1.294          | -3.646          | 5M6F       |                       |
| <b>P2</b>     | Leu307         | -7.411      | -3.308          | 5.521           | -0.247          | -9.329          | 5M6F       | <b>-11.082</b>        |
|               | Thr308         | -3.671      | -0.681          | 8.318           | -3.175          | -8.746          | 5M6F       |                       |
| <b>P3</b>     | Trp323         | -7.59       | -2.475          | 6.956           | -3.666          | -11.72          | 5M6F       | <b>-5.281</b>         |
|               | Tyr324         | 2.309       | 1.636           | 1.424           | -0.65           | -2.144          | 5M6F       |                       |
| <b>P4</b>     | Leu292         | 0.944       | 0.77            | 2.413           | -0.326          | -1.974          | 5M6F       | <b>-13.674</b>        |
|               | Asp296         | -32.685     | -41.335         | 0               | 0               | 0               | 5M6F       |                       |
|               | Lys297         | 6.645       | 17.456          | 1.58            | -1.107          | -4.261          | 5M6F       |                       |
|               | Val298         | 2.682       | 3.338           | 0.091           | -0.216          | -0.708          | 5M6F       |                       |
|               | Lys299         | 8.74        | 17.501          | 0.947           | -1.166          | -2.29           | 5M6F       |                       |



**Table S7.** The calculated PIEDA (kcal/mol) between **6** and XIAP-BIR3 in the four subpockets.

| <b>Pocket</b> | <b>Residue</b> | <b>PIEs</b> | $\Delta E^{es}$ | $\Delta E^{ex}$ | $\Delta E^{ct}$ | $\Delta E^{di}$ | <b>PDB</b> | <b>Total<br/>PIEs</b> |
|---------------|----------------|-------------|-----------------|-----------------|-----------------|-----------------|------------|-----------------------|
| <b>P1</b>     | Asp309         | -68.468     | -77.859         | 9.13            | -4.517          | -7.004          | 5C83       | <b>-212.64</b>        |
|               | Trp310         | -36.552     | -32.564         | 7.11            | -3.168          | -8.309          | 5C83       |                       |
|               | Glu314         | -112.202    | -114.069        | 9.766           | -7.025          | -8.067          | 5C83       |                       |
|               | Gln319         | 4.582       | 2.891           | 3.47            | -0.903          | -4.062          | 5C83       |                       |
| <b>P2</b>     | Leu307         | -9.434      | -5.608          | 6.124           | 0.215           | -9.956          | 5C83       | <b>-11.111</b>        |
|               | Thr308         | -1.677      | 1.341           | 8.45            | -3.311          | -9.198          | 5C83       |                       |
| <b>P3</b>     | Trp323         | -9.495      | -4.075          | 7.626           | -3.295          | -12.128         | 5C83       | <b>-8.137</b>         |
|               | Tyr324         | 1.358       | 0.129           | 1.994           | -0.71           | -2.456          | 5C83       |                       |
| <b>P4</b>     | Leu292         | 1.088       | 0.734           | 3.018           | -0.471          | -2.217          | 5C83       | <b>-15.536</b>        |
|               | Asp296         | -34.917     | -42.787         | 0               | 0               | 0               | 5C83       |                       |
|               | Lys297         | 8.584       | 14.735          | 3.062           | -1.405          | -5.188          | 5C83       |                       |
|               | Val298         | 3.024       | 3.679           | 0.099           | -0.231          | -0.751          | 5C83       |                       |
|               | Lys299         | 6.685       | 15.301          | 1.99            | -1.917          | -3.239          | 5C83       |                       |

**Table S8.** The calculated PIEDA (kcal/mol) between **7** and XIAP-BIR3 in the four subpockets.

| <b>Pocket</b> | <b>Residue</b> | <b>PIEs</b> | $\Delta E^{es}$ | $\Delta E^{ex}$ | $\Delta E^{ct}$ | $\Delta E^{di}$ | <b>PDB</b> | <b>Total<br/>PIEs</b> |
|---------------|----------------|-------------|-----------------|-----------------|-----------------|-----------------|------------|-----------------------|
| <b>P1</b>     | Asp309         | -73.959     | -91.737         | 12.22           | -7.152          | -10.033         | 5M6H       | <b>-208.998</b>       |
|               | Trp310         | -33.244     | -30.403         | 7.332           | -3.366          | -8.617          | 5M6H       |                       |
|               | Glu314         | -106.505    | -110.564        | 10.322          | -7.337          | -8.164          | 5M6H       |                       |
|               | Gln319         | 4.71        | 3.698           | 3.646           | -0.958          | -4.146          | 5M6H       |                       |
| <b>P2</b>     | Leu307         | -7.909      | -4.58           | 6.957           | 0.151           | -10.536         | 5M6H       | <b>-10.527</b>        |
|               | Thr308         | -2.618      | 0.52            | 9.744           | -3.417          | -10.607         | 5M6H       |                       |
| <b>P3</b>     | Trp323         | -10.855     | -4.841          | 6.747           | -3.362          | -11.739         | 5M6H       | <b>-7.469</b>         |
|               | Tyr324         | 3.386       | 0.911           | 2.154           | -0.813          | -2.511          | 5M6H       |                       |
| <b>P4</b>     | Leu292         | -3.149      | -3.894          | 4.775           | -1.989          | -3.164          | 5M6H       | <b>-19.411</b>        |
|               | Asp296         | 1.241       | 0.771           | 3.143           | -0.385          | -2.258          | 5M6H       |                       |
|               | Lys297         | -35.837     | -45.945         | 0               | 0               | 0               | 5M6H       |                       |
|               | Val298         | 6.123       | 20.155          | 2.367           | -1.487          | -5.298          | 5M6H       |                       |
|               | Lys299         | 3.151       | 4.045           | 0.126           | -0.184          | -0.779          | 5M6H       |                       |

**Table S9.** The calculated PIEDA (kcal/mol) between **8** and XIAP-BIR3 in the four subpockets.

| <b>Pocket</b> | <b>Residue</b> | <b>PIEs</b> | $\Delta E^{es}$ | $\Delta E^{ex}$ | $\Delta E^{ct}$ | $\Delta E^{di}$ | <b>PDB</b> | <b>Total<br/>PIEs</b> |
|---------------|----------------|-------------|-----------------|-----------------|-----------------|-----------------|------------|-----------------------|
| <b>P1</b>     | Asp309         | -67.007     | -82.505         | 8.569           | -5.209          | -8.366          | 5M6M       | <b>-222.379</b>       |
|               | Trp310         | -31.978     | -30.649         | 7.534           | -3.051          | -8.688          | 5M6M       |                       |
|               | Glu314         | -111.943    | -117.812        | 11.852          | -7.096          | -8.354          | 5M6M       |                       |
|               | Gln319         | -11.451     | -6.637          | 2.122           | -1.127          | -3.533          | 5M6M       |                       |
| <b>P2</b>     | Leu307         | -8.306      | -3.401          | 5.652           | -0.242          | -10.059         | 5M6M       | <b>-9.494</b>         |
|               | Thr308         | -1.188      | 2.379           | 7.893           | -3.181          | -9.591          | 5M6M       |                       |
| <b>P3</b>     | Trp323         | -6.593      | -1.294          | 7.395           | -3.384          | -12.323         | 5M6M       | <b>-2.047</b>         |
|               | Tyr324         | 4.546       | 1.709           | 1.884           | -0.771          | -2.503          | 5M6M       |                       |
| <b>P4</b>     | Leu292         | 1.072       | 0.879           | 2.298           | -0.275          | -1.746          | 5M6M       | <b>-12.993</b>        |
|               | Asp296         | -36.286     | -45.542         | 0               | 0               | 0               | 5M6M       |                       |
|               | Lys297         | 10.536      | 20.833          | 1.988           | -1.182          | -4.712          | 5M6M       |                       |
|               | Val298         | 3.303       | 3.954           | 0.083           | -0.215          | -0.715          | 5M6M       |                       |
|               | Lys299         | 8.382       | 18.452          | 0.913           | -1.534          | -2.446          | 5M6M       |                       |

**Table S10.** The calculated PIEDA (kcal/mol) between **9** and XIAP-BIR3 in the four subpockets.

| Pocket    | Residue | PIEs    | $\Delta E^{es}$ | $\Delta E^{ex}$ | $\Delta E^{ct}$ | $\Delta E^{di}$ | Total PIEs     |
|-----------|---------|---------|-----------------|-----------------|-----------------|-----------------|----------------|
| <b>P1</b> | Asp309  | -16.345 | -15.222         | 5.92            | -2.885          | -5.635          | <b>-43.507</b> |
|           | Trp310  | -16.164 | -14.792         | 6.543           | -3.099          | -3.532          |                |
|           | Glu314  | -4.812  | 1.0             | 0.006           | -0.271          | -0.389          |                |
|           | Gln319  | -6.186  | -4.24           | 1.931           | -1.176          | -2.606          |                |
| <b>P2</b> | Leu307  | -2.328  | 1.0             | 0.197           | -0.591          | -2.293          | <b>-3.345</b>  |
|           | Thr308  | -1.017  | 2.082           | 0.603           | -0.831          | -2.928          |                |
| <b>P3</b> | Trp323  | -14.657 | -6.194          | 11.601          | -4.753          | -15.658         | <b>-54.961</b> |
|           | Tyr324  | -40.304 | -41.637         | 20.549          | -6.965          | -11.645         |                |
| <b>P4</b> | Leu292  | 0.132   | 0.028           | 0               | 0               | 0               | <b>0.570</b>   |
|           | Asp296  | -5.093  | -3.232          | 0               | 0               | 0               |                |
|           | Lys297  | 2.402   | 0.73            | 0               | 0               | 0               |                |
|           | Val298  | 0.309   | 0.104           | 0               | 0               | 0               |                |
|           | Lys299  | 2.82    | -0.434          | 0               | 0               | 0               |                |

**Table S11.** The calculated PIEDA (kcal/mol) between **10** and XIAP-BIR3 in the four subpockets.

| <b>Pocket</b> | <b>Residue</b> | <b>PIEs</b> | $\Delta E^{es}$ | $\Delta E^{ex}$ | $\Delta E^{ct}$ | $\Delta E^{di}$ | <b>Total PIEs</b> |
|---------------|----------------|-------------|-----------------|-----------------|-----------------|-----------------|-------------------|
| <b>P1</b>     | Asp309         | -4.786      | -5.202          | 1.711           | -1.418          | -3.468          | <b>-64.750</b>    |
|               | Trp310         | -26.751     | -40.509         | 31.662          | -11.812         | -5.108          |                   |
|               | Glu314         | -33.045     | -35.33          | 14.344          | -5.917          | -4.857          |                   |
|               | Gln319         | -0.168      | 1.782           | 0.132           | -0.445          | -1.158          |                   |
| <b>P2</b>     | Leu307         | -6.274      | -0.763          | 2.624           | -1.553          | -5.637          | <b>-7.906</b>     |
|               | Thr308         | -1.632      | 0.18            | 2.487           | -1              | -5.304          |                   |
| <b>P3</b>     | Trp323         | -13.109     | -8.173          | 10.321          | -3.747          | -12.333         | <b>-21.047</b>    |
|               | Tyr324         | -7.938      | -6.952          | 5.745           | -2.534          | -4.227          |                   |
| <b>P4</b>     | Leu292         | -0.366      | -0.164          | -0.001          | -0.151          | -0.283          | <b>-43.385</b>    |
|               | Asp296         | -1.902      | -4.222          | 0               | 0               | 0               |                   |
|               | Lys297         | -34.63      | -35.144         | 13.289          | -3.84           | -4.832          |                   |
|               | Val298         | 0.623       | 0.686           | 0               | 0               | 0               |                   |
|               | Lys299         | -7.11       | -0.086          | 0.796           | -0.529          | -2.252          |                   |
